## COVID-19 in meat plants: activation of a Target Prevention Plan, in Italy

Giorgio Di Leone<sup>1a</sup>, Luigi Bertinato<sup>2a</sup>, Gianfranco Brambilla<sup>2b,\*</sup>, Valerio Manno<sup>2c</sup>, Flavio Napolano<sup>1a</sup>, Simona Savi<sup>3</sup>, Gaetano Settimo<sup>2d</sup>, and Domenico Lagravinese<sup>1b</sup>

<sup>1</sup> ASL Bari, Dipartimento di prevenzione, aServizio Prevenzione e Sicurezza degli Ambienti di Lavoro (SPESAL), Via Giorgio de Chirico, 7 - 70056 Molfetta - Italy; b Direzione, Lungomare Starita, 6, I-70100 Bari, Italy.

<sup>2</sup> Istituto Superiore di Sanità, aSegreteria Scientifica Del Presidente; bDipartimento Alimentazione, Nutrizione e Sanità Pubblica Veterinaria; cServizio di Statistica; dDipartimento Ambiente e Salute, Viale Regina Elena, 299 I-00161 Rome, Italy

<sup>3</sup> ATS Città metropolitana di Milano, Servizio Prevenzione e Sicurezza Ambienti di Lavoro (SPESAL), sede di Lodi, Piazza ospitale 10, I- 26900 Lodi, Italy.

\*corresponding author: [gianfranco.brambilla@iss.it](mailto:gianfranco.brambilla@iss.it) <https://orcid.org/0000-0003-1571-1203>

### Abstract

During the COVID-19 pandemics, several outbreaks have been recorded all over the world in industrial slaughterhouses and meat processing plants. Occupational preventive medicine in such non-healthcare frontline essential services accounts for combined different environmental, social, and economic factors, to reduce the burden of COVID-19 in the workplaces and in the connected residential settings. In Italy, during the first year of the pandemics, an advocacy action has been activated, targeted on meat plant managers and related food business operators. A risk-oriented control plan was agreed by competent Italian Health Authorities at Region/Province level. A questionnaire focused on the inventoried risk factors reported in the literature in such working places have been developed as supporting tool, and administered on voluntary basis to the interested stakeholders. In addition, an outbreak questionnaire was proposed to the Prevention Depts of the Local Health Units. In the 2021 – 2022 years timeframe, we collected 333 advocacy and 24 outbreak questionnaires, respectively, on 4,765 inventoried plants at national level. Responses came mainly from those districts that locally activated the risk-oriented control plan. The lack of awareness to

**NOTE: This preprint reports new research that has not been certified by peer review and should not be used to guide clinical practice.**

update the Risk Assessment Document of the meat plant for COVID-19, non instrumental body

1 Temperature checks of workers at the entrance, working force from different subcontractors, poor  
2 hygiene in the shared places and insufficient ventilation represented the main critical points  
3 recorded. The cross-checks between the results from the advocacy and from the outbreak  
4 questionnaires are feeding an after-action review for such food-chain related essential work settings  
5 within a One Health approach.

6

7

## 1     **1.     Introduction**

2

3           During the Covid-19 pandemics, it became progressively clear that also some occupational non

4     healthcare settings could be vulnerable to outbreaks: this was the case of meat plants (slaughterhouses,

5     meat processing and cutting plants) where the combination of environmental, social, and working condition

6     factors represented a driver for contagiousness among workers [1], extended in some cases to relatives in

7     the residential settings [2]. (Taylor et al., 2020). From 2020, rapid and large-scale COVID-19 outbreaks in

8     high throughput industrial meat plants with a working force up to 20,000 workers have been reported in the

9     US and Canada, and in the European Union [3-5]. The epidemiological investigations have more and more

10    elucidated the combined risk factors that favour the Sars-CoV-2 enter and persistence in the working places,

11    and the spread among workers, such as: a) Workforce recruitment and turnover, collective transport systems

12    to/from the working place, and housing [6-8]; b) Working places with poor ventilation and insufficient fresh

13    air exchange; c) Presence of aerosol/vapours able to transport the virus well above the 1-2 m distance

14    prescribed among workers, and d) cool surfaces where virus particles could condense and persist for days

15    [9]. COVID-19 and more in general contagious infectious diseases outbreaks in such essential settings for the

16    food chain represent a food insecurity factor, as matter industrial slaughterhouses are a critical point to

17    guarantee the meat supply chain from farm to fork: if the abatement of intensive farmed high inbred poultry

18    and pigs is postponed only for few days, animal welfare and meat quality worsen, thus hampering the cost

19    effectiveness of the food production and provoking food waste. In addition, the presence of Sars-Cov-2

20    genome on the surface of packaged meat [10, 11] has been a matter of international import/export dispute

21    within the World Trade Organization [12], thus causing food chain disruption.

22    In this paper we aim to describe the results of a target plan on COVID-19 prevention in meat plants in Italy,

23    set up at the end of 2020. Such target prevention plan, designed on the basis of the first epidemiological

24    evidences in Italy and abroad, has been proposed to the Regional and Province Health Authorities for its

25    adoption and implementation, despite the urgent priorities in the healthcare territory setting determined by

26    the evolution of the pandemics in Italy. **Figure 1** illustrates the activation steps of this plan in the context of

1 the recorded pandemic curve in healthcare and non-healthcare workers in Italy from official data  
2 (<https://www.epicentro.iss.it/coronavirus/sars-cov-2-dashboard>).

3

## 4 **2. Materials and Methods**

5

### 6 2.1 *Set up of questionnaires for COVID-19 Occupational Health in meat plants.*

7 In Italy, the activity of preventive medicine in occupational settings has been assigned to Regions and  
8 Provinces, under the co-ordination of Italian Regions Conference, technically supported by the Working  
9 Group on “Health and Safety at the working places”. This WG has mandate to propose the activation of the  
10 so called “Target Prevention Plans” to the Regions and Provinces; these plans consist on an advocacy action  
11 with the stakeholders to reach priority and risk-oriented targets of health prevention in the working places.  
12 Within this frame, on April 2020 the Istituto Superiore di Sanità, as Technical Scientific Institution of the Italian  
13 Health System contacted the Local Health Unit of Bari – Apulian Region, who reported the first COVID-19  
14 outbreak in a meat plant [13]; on the basis of the evidences from the field and those reported in the scientific  
15 literature, an advocacy webinar was organised on September 2020, with the involvement of meat plants  
16 associations, national, regional, province authorities, to share evidences and experiences. The final outcome  
17 was the proposition of three different tools to support a target COVID-19 prevention plan in meat plants: 1)  
18 a first questionnaire addressed to meat plants management about the critical control points to be considered  
19 for the prevention and risk assessment of COVID-19; 2) a second questionnaire addressed to local health  
20 authorities for the reporting of COVID-19 outbreaks; 3) a harmonised check list for the official inspection by  
21 competent local authorities at meat plants. The first two questionnaires, after a first on-field validation, have  
22 been published with an Italian and English versions in the COVID-19 Reports edited by Istituto Superiore di  
23 Sanità [14], and made freely available to stakeholders via Google Modules platform, under the General Rules  
24 for Data Protection. Italian Meat Plant Associations were asked to inform their members about the  
25 opportunity participate to such survey on voluntary basis. The responses to the advocacy and the outbreak  
26 questionnaires were collected from the end of December 2020, till the end of December 2022, and reported

1 as results in this paper. In **Figure 2** the flow-diagram illustrates the main health-related stakeholders and  
2 the COVID-19 prevention activities at the working places

3

### 4 **3. Results:**

#### 5 *3.1 Awareness about the critical control points to be considered by meat plant management*

6 *3.1.1 Meat plant profiling and workforce:* During the considered two years timeframe (20-22), we recorded  
7 333 filled and validated COVID-19 awareness questionnaires on a total of 4,675 slaughterhouses and meat  
8 cutting and processing plants inventoried at central level by the competent Authority  
9 (<https://www.dati.salute.gov.it/dati/dettaglioDataset.jsp?menu=dati&idPag=8>).

10 The geographical provenience of such modules acknowledges in large part those Italian  
11 Regions/Autonomous Provinces who explicitly declared their interest in such Targeted Prevention Plan. In  
12 the details: Lombardy (N =140), Veneto (N=95), Trentino (N =37), Calabria (N=29), Apulian (N= 11), Piedmont  
13 (N=9), Emilia-Romagna (N=6), Sardinia (N=3), Lazio, Sicily and Umbria (N= 1), respectively.

14 In **Table 1**, we report the different plant typologies, that in some cases acknowledge the presence of  
15 a cutting plant associated to the slaughterhouse, and activities addressed to different animal species.

16 Most of the responding plants indicate a working activity not extended on all the 6-7 week days. This  
17 implies the working force mostly is not shifted within the same working day (N = 302; 91%). Two and three  
18 working shifts/day have been recorded in the 5% and 2% of the plants respectively. Missed answers = 2% .

19 Full details in **Table 2a**.

20 Non permanent staff (cooperatives, third parties, autonomous workers) is present in the 42% of the  
21 companies (N = 139). Cooperatives are regularly present in 125 plants: 52/125 plant managers engage one  
22 cooperative; 36/125, two; 18/125, three; 10/125 four-five; 9/125, 6 or more. The working force from non  
23 permanent staff is generally shared over different activities, from livestock handling, to cleaning and  
24 packaging. The overall number of workers (permanent, non permanent) present on average in the  
25 responding plants is reported in the **Table 2b**.

1 *3.1.2 Preventive measures at the working place and personnel management.* All the responding food business  
2 operators declare workers have been properly informed about the preventive measures to be taken in case  
3 of suspect of Covid-19 (such as: stay at home, if symptomatic; call the appointed physician of the healthcare  
4 system; alert the plant staff if symptomatic at the working place and avoid close contacts; follow the rules to  
5 prevent contagiousness at the working places. The regular instrumental check of the body Temperature at  
6 the entrance of the plant has been reported in the 73% of answers (243/333); in 56 cases (17%) it was asked  
7 a self-declaration, and in 1 case, this procedure is omitted. Missed/inconsistent answers were notably the  
8 10%. Independent and time-shifted way in/way out pathways for workers and visitors are present in 305/333  
9 cases (92%), while dedicated toilets only in the 37% of cases (123/333).

10 Visitors are not informed about preventive measures in 19/333 cases (9%), and appropriate checks  
11 about the appropriate and regular application of the preventive measures not fully implemented in 123/333  
12 plants (37%). Regular cleaning and sanitization of the shared places, changing rooms, canteens are in place  
13 in the 95% of the plants, with daily frequencies in the 59% of cases, three/four times a week in the 15%, and  
14 once/twice a week in the 15%, respectively. The remaining 1% report a cleaning and sanitization interval  
15 over 7 days.

16 The accessible and easy-to-find presence of hand-washing dispensers is declared in the 99% of the  
17 prevention questionnaires. Personal Protective Equipments (PPEs) declared always available in 278/333  
18 (83%) of cases, when interpersonal distance are less than 1 meter, according to the national guide-lines  
19 issued by the Italian Government on March 20 (Decreto del Presidente del Consiglio dei Ministri 11 marzo  
20 2020), and the technical updated on April 20 by the National Institute for Insurance against Accidents at Work,  
21 a public non-profit entity safeguarding workers against physical injuries and occupational diseases  
22 ([https://www.inail.it/cs/internet/docs/alg-pubbl-rimodulazione-contenimento-covid19-sicurezza-](https://www.inail.it/cs/internet/docs/alg-pubbl-rimodulazione-contenimento-covid19-sicurezza-lavoro.pdf)  
23 [lavoro.pdf](https://www.inail.it/cs/internet/docs/alg-pubbl-rimodulazione-contenimento-covid19-sicurezza-lavoro.pdf)). In 16 cases (5), because a workers' distance above 1 m, the answer is negative. Missed/wrong  
24 answers accounted for 10%. PPE were reported to be changed every day in the 99% of cases, and information  
25 and instruction about their their proper use/wearing present in 315/333 answers (95%). Details about the

1 PPE used in the plants, according to the working force were present in 293 questionnaires, and are reported  
2 in **Table 3**.

3 Appropriate workplace organization to keep the prescribed minimum distance of 1 meter between  
4 workers has been implemented in 173/333 plants (53%); in 135 cases (41%) it has been reported the  
5 implementation of such measure is not necessary. The remaining 6% of plants gives negative or missed  
6 answers. The presence of physical barriers between workers has been reported in 116 answers (35%), while  
7 in the 50% of cases, it is declared the absence of a specific need.

8 The time zones at the entrance and exit have been designed to respect the 1 m distance in 168 plants  
9 (50%), while in 143 it is not the case. Negative answers account for the 7% (N=23). Staggered shifts to the  
10 canteen and to shared places are present in the 87% of cases (N=290).

11 Smart working is implemented in 63 plants (19%) for those non-essential activities; a personnel turn-  
12 over plan to reduce the contacts has been reported in 71 answers (21%), with negative answers in the  
13 remaining 263 cases. Social valves in case of absence from the working place due to Covid-19 illness have  
14 been activated in 86 plants (26%). In 164 cases (49%) workers have been asked to take holidays, with negative  
15 and missed answers in the remaining 25%.

16 The activation of a committee (with occupational health responsables and trade union  
17 representatives) (**Figure 2**) in charge to verify the application of the COVID-19 preventive measures has been  
18 reported in 171 plants (51%), and the COVID-19 update of the mandatory document on the risk assessment  
19 in the 83% of answers (83%).

20  
21 *3.1.3 Ventilation and vapour/aerosol formation.* In **Table 4** we report the recorder answers for the questions  
22 related to the ventilation, according to the different plant premises. The regular maintenance of HVAC filters  
23 is declared in the 90% of plants, while records of ventilation maintenance is reported in the 50% of the plants,  
24 only.

25

26

1 *3.1.4. Vapours and aerosols generation.* In 287 plants (86%) the cleaning of the working places acknowledges  
2 the use of high pressure water jets. Among them, 65 plants (20%) report such operation is carried out in  
3 presence of workers. In pig slaughterhouses, scraping is performed with hot water baths (N=94), with steam  
4 and water (N=7), with singeing (N= 52), with brushing and showering (N=43), with infrared beams (N7).  
5 Missed answers account for N=33. In those scraping activities where water is used, 80 answers report such  
6 procedure in presence of workers. The distance from the vapour/aerosol source is <1 m in 7 plants, >1>2m  
7 in 38, and >2 in 35, respectively. Aspiration systems are in place in 59/89 plants. In poultry slaughterhouses  
8 the use of water for animal electric stunning as proxy for vapour generation is reported in 23/32 plants.  
9 Nebulizer systems to improve animal welfare in the pre-slaughter area and lairage are present in 42/230  
10 slaughterhouses; in 9 cases in presence of workers.

11 *3.2 Results from Outbreaks Questionnaires.* Within the 2021-2022 time-frame, on voluntary basis we  
12 received 24 outbreak validated reports from the officers of the Preventive Departments of Local Health Units.  
13 In **Tables 5 and 6** are reported the descriptors of the outbreaks and the corrective measures taken,  
14 respectively.

15



#### 1 **4. Discussion**

2           The main feature of Italian slaughterhouses and of processing/cutting plants is the rather huge  
3 number (N = 4,675 officially registered. Among them, around 20 plants have a working force above 500 up  
4 to 2,000 units: In the poultry sector, 6 industrial plants cover the 90% of the national production. Within this  
5 frame, the reduced working force in most of the plants, along to activities carried out not all the week long  
6 **(Table 2 a,b)** represent mitigation factors with respect to COVID-19 spread and related outbreaks reported  
7 in large industrial plants also as matter of higher workers density coupled also to a longer stay in working  
8 place via the use of overtime as already noted by Dyal et al., and Waltenburg et al., [3, 4]. On the other side,  
9 such a diffuse presence of plants on the Italian territory, hampers a capillary monitoring activity of the  
10 preventive COVID-19 procedures in place. It's worth noting during the pandemics **(Figure 1)** the professional  
11 resources of the Prevention Departments of the Local Health Unit in charge of the health prevention in the  
12 working places have been absorbed by other health priorities, such as contact tracing, testing, vaccination.  
13 Owing to the above, an advocacy activity based on the proposition of a Target Plan of Prevention seemed  
14 more appropriate and practicable.

15           The results we present in this paper do not cover all the initiatives taken to prevent and manage  
16 COVID-19 outbreaks in meat plants on the national territory. For instance, Emilia Romagna Region  
17 independently from this initiative, activated cultural mediators to inform and to form non Italian workers  
18 about procedures to be adopted to lower the risk (such as quarantine period back from holidays in the  
19 Country of origin, priority in the diagnostic tests, and then, in a second stage, support to vaccination) as  
20 reported in a Canadian – Ontario case [8]. The shared knowledge of such in a webinar organised on Sept  
21 2020 by Istituto Superiore di Sanità with the participation of the representatives of meat plan associations  
22 and health stakeholders, contributed to the questionnaires set up.

23           The collected answers (N = 333) to the advocacy questionnaire represent the 7% of the registered  
24 plants in Italy, and are mostly located in those districts whose Regional/Province Health Authorities agreed  
25 to activate the Target Prevention (Lombardy, N=140; Veneto, N=95), according to the flow diagram reported  
26 in **Figure 2**. The support at local level has been also determined by the high added social and economic added

1 given to processed meat products (such as ham and salami) from such geographical areas. The reduced  
2 dimension of the meat plants in Italy may have contributed to a reduced perception of the relevance of the  
3 initiative, thus determining a limited participation to the survey on voluntary basis. In the United States, a  
4 survey on COVID-19 at slaughterhouses accounted for the active participation of 28 out of 50 States (56%),  
5 accounting for an average number of 3,500 meat plants, with an overall workforce of 525,000 workers [4].

6 Despite the 7% of adhesion to the Italian initiative, the answers recorded from the advocacy  
7 questionnaire reflect the presence of those structural, environmental, and management risk factors, already  
8 reported in the literature [15, 16] .

9 The working force management, with non permanent staff (cooperatives, third parties, autonomous  
10 workers) present in the 42% of the companies (N = 139) indicates the risk of formation of non homogeneous  
11 teams as a factor that could facilitate the contagiousness within the same workshift. This critical factor finds  
12 a feed-back in the 24 reported outbreaks, where, on average, 3 cooperatives (min/max = 0 - 6) were present  
13 (**Table 5**). In the personnel management, a combined risk indicator for the entrance and spread of COVID-  
14 19 among workers, includes the number of animals slaughtered/processed per day, the number of timeshifts  
15 per day, and the data about external workforce. Within this frame, the answers about the instrumental check  
16 of the body Temperature at the entrance recorded in the 27% of the plants only, represent another weak  
17 point of the preventive action, especially in presence of a pandemic  $R_t$  well  $>1$  in the general population. The  
18 mitigation of the risk in the working place relies also on appropriate information and formation of the  
19 workers, along to the verification if the preventive measures are correctly put in place, and last but not least  
20 the activation of COVID-19 illness social valves (in our survey present in the 26% of plants, only). Again, the  
21 relevance of such factors has been highlighted by the evidences from the outbreak managements (**Table 6**),  
22 where the plant responsables had to re-inforce the checks, re-draft the entrance and exit paths of workers  
23 and external personnel, improve information and formation (42% of the reported outbreaks), and provide  
24 devices for a better personal hygiene (in the 38% of the cases).

25

1           The overall need of a advocacy activity towards the real adoption of COVID-19 preventive measures  
2 and the check of their correct application by meat plant management is highlighted by the recorded delay in  
3 the set up of the meat plant committee formed by occupational safety responsables and trade union  
4 representatives in charge of this task (51% of positive answers), despite the COVID-19 update of the  
5 mandatory document on the risk assessment recorded in the 83% of answers (**Figure 2**). To this respect, the  
6 recorded generation of vapour and aerosols in some working areas according to each plant structure seem a  
7 factor to be not overlooked in the update of the plant document on risk assessment. This, because it has  
8 been demonstrated Sars-CoV-2 could reach distances well over those minimum prescribed between workers  
9 (1-2 m) in presence of vapour and aerosols, as reported in the in industrial slaughterhouses, in Germany  
10 [17]. This represent a risk factor especially if vapour/aerosol exposed workers do not wear adequate PPE  
11 (**Table 4**).

12           The ventilation, with an adequate natural air exchange represents another preventive measure stressed in  
13 the advocacy questionnaire, as far as it has been demonstrate the relative percentage of CO<sub>2</sub> could be  
14 assumed as a proxy of insufficient indoor air exchange [15, 18]. When air is recycled, it is worthy to consider  
15 that a recycling percentage above 30% may be inadequate for the prevention, especially when adequate  
16 filtering systems are not in place. High percentage of recycled air may acknowledge seasonal trends, as  
17 matter of energy savings policies to keep room temperature adequate for the specific activities of the  
18 working area (chilling or air warming during summer or winter, for instance). To this purpose, as feedback,  
19 structural modifications of the ventilation have been considered in 6 out of 24 cases in the management of  
20 outbreaks (**Table 6**). Such measure has been associated to an increase of the inter-worker distance in the  
21 17% of cases. Last but not least, in presence of a HVAC system, the air fluxes in the working area should be  
22 addressed correctly.

23           Considering the reported outbreaks dates, it is worthy to fix the date of July 20, as discriminant for  
24 the COVID-19 vaccination campaign extended to the Italian general population (meat plant workers  
25 included). Before such date, vaccines were administered to fragile persons and to most exposed workers  
26 categories, such those working in the healthcare settings, schools, and police forces. With respect to such

1 date, we registered 14 outbreaks before, and 10 outbreaks later. This means vaccination could not represent  
2 alone an effective prevention in such setting, but it should accompany all the supporting preventive  
3 measures, especially when the workforce is in large part not autochthonous (Fabreau et al., 2022).

4 The outbreaks lasted on average 26 days (one outlier data of 180 gg excluded) (**Table 5**), with an  
5 overall 26% positivity rate among workers, in line with the prevalence reported in other papers: 3 - 24% from  
6 Waltenbur et al., [4], 18% from Di Leone et al., [13], 26% from Steinberg et al., [19], 30-40% from Vanderwaal  
7 et al., [20], 12-16% from Pokora et al., [9] 33% from Walshe et al., [15], 36% from Finci et al., [16]. Of interest,  
8 the 5 outbreaks reported from the Trentino-Alto Adige Province, where almost the same cooperatives were  
9 turned-over among the plants involved (Dario Huber, personal communication).

10 Among the reported outbreaks, the description of the widest Italian outbreak occurred in a poultry  
11 slaughterhouse and cutting plant (August – September 20) has been missed. From public available  
12 information as those reported on the website of the Veterinary Trade Union of the Veneto Region,  
13 positivities involved 200/675 workers belonging to 12 different nationalities, and the massive and intensified  
14 screening with rapid tests allowed the 50% reduction of the activities, instead of their full withdraw  
15 ([https://www.sivempveneto.it/covid-19-focolai-in-impianti-di-macellazione-il-sivemp-veneto-massima-  
16 attenzione-alla-sicurezza-dei-veterinari-ufficiali-protezioni-e-screening-costanti/](https://www.sivempveneto.it/covid-19-focolai-in-impianti-di-macellazione-il-sivemp-veneto-massima-attenzione-alla-sicurezza-dei-veterinari-ufficiali-protezioni-e-screening-costanti/)).

17

## 18 **5. Conclusions**

19 To conclude, the proposition to the territory of a Target Prevention Plan on COVID-19 in meat plants,  
20 supported by guidelines and advocacy questionnaires represented a valuable tool to harmonise and risk-  
21 orient the activities of the Health Preventive Departments on the territory. The cross-checks between the  
22 results from the advocacy and from the outbreak questionnaires will help to assess and illustrate to the  
23 stakeholders the critical points to be implemented in term of preparedness, within an after-action review for  
24 such food-chain related essential work settings not linked to healthcare services. Within this frame, because  
25 COVID-19 has been acknowledged as an “emerging infectious disease of probable animal origin”, meat plants

1 and related settings represent health, cultural, social, economic, and food safety/security environments  
2 where “One Health” preventive cost-effective approaches could be practiced.

3

#### 4 **Acknowledgements:**

5 The Authors wish to thanks all the active participants to the questionnaires initiative and the followind  
6 colleagues who institutionally supported the initiative: Adelina Brusco, Silvia D’Amario, Fabio Boccuni, Bruna  
7 Maria Rondinone, Paola Tomao, Nicoletta Vonesch, and Sergio Iavicoli from INAIL; Nicoletta Cornaggia, DG  
8 Welfare Regione Lombardia; Francesca Russo, Direzione Prevenzione, Sicurezza Alimentare, Veterinaria  
9 Regione del Veneto; Mara Bernardini and Anna Padovani, Regione Emilia-Romagna; Anna Marinella Firmi  
10 and Alberto Righi, ATS Valpadana; Dario Uber, APSS Provincia di Trento.

11

12 DOI: Authors declare no competing interest

13

14

#### 15 Credits

16 Giorgio Di Leone, Simona Savi, Gianfranco Brambilla: conceptualization and relationship with stakeholders

17 Gianfranco Brambilla: manuscript writing and references

18 Flavio Napolano, Gaetano Settimo, Valerio Manno and Simona Savi: Questionnaires formulation and analysis  
19 of the answers

20 Domenico Lagravinese and Luigi Bertinato: manuscript supervisors

21

#### 22 Figures Captions

23 **Figure 1.** COVID-19 pandemic curve in Italian workers, along with the events leading to the activation of a  
24 Target Prevention Plan in Meat Plants.

25 **Figure 2.** Flow diagram of the stakeholders (boxed) and the activities (circled) involved in the set up of a  
26 COVID-19 risk-oriented prevention plan in Meat Plants, in Italy.

27

28

## 1 6. References

- 2 1. Middleton, J., Reintjes, R., Lopes H., 2020. Meat plants—a new front line in the covid-19 pandemic  
3 BMJ 20;370:m2716. <http://dx.doi.org/10.1136/bmj.m2716>
- 4 2. Taylor, C.A., Boulos, C., and Douglas, A., 2020. Livestock plants and COVID-19 transmission. PNAS  
5 117: 31706-31715. [www.pnas.org/cgi/doi/10.1073/pnas.2010115117](http://www.pnas.org/cgi/doi/10.1073/pnas.2010115117)
- 6 3. Dyal, J.W., et Corporate Authors from US Centres of Diseases Control and Prevention, 2020. COVID-  
7 19 Among Workers in Meat and Poultry Processing Facilities — 19 States, April 20. MMWR / May 8, 20 / Vol.  
8 69 / No. 18 557-61.
- 9 4. Waltenburg, M.A., et Corporate Authors from US Centres of Diseases Control and Prevention, 2020.  
10 Update: COVID-19 Among Workers in Meat and Poultry Processing Facilities — United States, April–May 20  
11 MMWR / July 10, 2020 / Vol. 69 / No. 27 887-92
- 12 5. European Centre for Diseases Prevention and Control (ECDC), 2020. Technical Report: COVID-19  
13 clusters and outbreaks in occupational settings in the EU/EEA and the UK. Accessed at:  
14 [https://www.ecdc.europa.eu/en/publications-data/covid-19-clusters-and-outbreaks-occupational-settings-](https://www.ecdc.europa.eu/en/publications-data/covid-19-clusters-and-outbreaks-occupational-settings-eueea-and-uk)  
15 [eueea-and-uk](https://www.ecdc.europa.eu/en/publications-data/covid-19-clusters-and-outbreaks-occupational-settings-eueea-and-uk)
- 16 6. European Federation of Food Agriculture and Tourism Trade Unions Associations (EFFAT), Report  
17 Covid-19 outbreaks in slaughterhouses and meat processing plants State of affairs and proposals for policy  
18 action at EU level 30 June 20. Accessed at: [https://effat.org/wp-content/uploads/20/06/EFFAT-Report-Covid-](https://effat.org/wp-content/uploads/20/06/EFFAT-Report-Covid-19-outbreaks-in-slaughterhouses-and-meat-packing-plants-State-of-affairs-and-proposals-for-policy-action-at-EU-level.pdf)  
19 [19-outbreaks-in-slaughterhouses-and-meat-packing-plants-State-of-affairs-and-proposals-for-policy-action-](https://effat.org/wp-content/uploads/20/06/EFFAT-Report-Covid-19-outbreaks-in-slaughterhouses-and-meat-packing-plants-State-of-affairs-and-proposals-for-policy-action-at-EU-level.pdf)  
20 [at-EU-level.pdf](https://effat.org/wp-content/uploads/20/06/EFFAT-Report-Covid-19-outbreaks-in-slaughterhouses-and-meat-packing-plants-State-of-affairs-and-proposals-for-policy-action-at-EU-level.pdf)
- 21 7. Mallet, Y., Pivette, M., Revest, M., et al., 2021. Identification of Workers at Increased Risk of Infection  
22 During a COVID-19 Outbreak in a Meat Processing Plant, France, May 20 Food Env Virol. 13:535–543.  
23 <https://doi.org/10.1007/s12560-021-09500-1>
- 24 8. Fabreau G.E., Holdbrook, L., Peters, C.E., Ronksley, P.E., Attaran, A., McBrien, K., Pottie, K., 2022.  
25 Vaccines alone will not prevent COVID-19 outbreaks among migrant workers—the example of meat  
26 processing plants. CMI, 28:773-778. <https://doi.org/10.1016/j.cmi.2022.02.004>

- 1 9. Pokora, R., Kutschbach, S., Weigl, M., et al., 2021. Investigation of superspreading COVID-19 outbreak  
2 events in meat and poultry processing plants in Germany: A cross-sectional study. PLoS ONE 16: e0242456.  
3 <https://doi.org/10.1371/journal.pone.0242456>
- 4 10. Bailey, E.S., Curcic, M., Sobsey, M.D., 2022. Persistence of Coronavirus Surrogates on Meat and Fish  
5 Products during Long-Term Storage. Appl Environ Microbiol. 88:e0050422. doi: 10.1128/aem.00504-22. Epub  
6 2022 Jun 7. Erratum in: Appl Environ Microbiol. 2022 88(16):e0119222.
- 7 11. Li, F., Wang, J., Liu, Z., Li, N., 2022. Surveillance of SARS-CoV-2 Contamination in Frozen Food-Related  
8 Samples - China, July 20 - July 21. China CDC Wkly. 4:465-470. doi: 10.46234/ccdcw2022.105.
- 9 12. World Trade Organization (WTO), Committee on Sanitary and Phytosanitary Measures 2021.  
10 Summary of the meeting of 3-5November 2021. Accessed at:  
11 <https://docs.wto.org/dol2fe/Pages/SS/directdoc.aspx?filename=q:/G/SPS/R104.pdf&Open=True>
- 12 13. Di Leone, G., Drago, P., Troiano, M., et al., 2020. Integrated management method in the prevention  
13 department of a COVID-19 epidemic outbreak in a large meat processing plant in Bari province. Epidemiol  
14 Prev. 44:334-339. doi: 10.19191/EP20.5-6.S2.134.
- 15 14. Agrimi, U., Bertinato, L., Brambilla, G., et al., 2021. Set up of a risk-oriented plan for the control and  
16 management of COVID-19 outbreaks in meat plants: ad interim methodological approach. Version of April 8,  
17 2021. Rapporto ISS COVID-19 n. 8/20 – English version. Accessed at:  
18 [https://www.iss.it/documents/20126/0/Rapporto+ISS+COVID+n.+8\\_21+EN.pdf/e2d1d27e-161d-cbce-3f58-  
19 22865f6f5d37?t=1625829502058](https://www.iss.it/documents/20126/0/Rapporto+ISS+COVID+n.+8_21+EN.pdf/e2d1d27e-161d-cbce-3f58-22865f6f5d37?t=1625829502058)
- 20 15. Walshe, N, Fennelly, M, Hellebust, S, et al., 2021. Assessment of Environmental and Occupational  
21 Risk Factors for the Mitigation and Containment of a COVID-19 Outbreak in a Meat Processing Plant. Front  
22 Public Health. 9:769238. doi: 10.3389/fpubh.21.769238.
- 23 16. Finci, I., Siebenbaum, R., Richtzenhain, J., et al., 2022. Risk Factors associated with an outbreak of  
24 COVID-19 in a meat processing plant in southern Germany, April to June 20. Euro Surveill. 27:pii=2100354.  
25 <https://doi.org/10.2807/1560-7917.ES.2022.27.13.2100354>
- 26 17. Günther, T., Czech-Sioli, M., Indenbirken, D., et al., 2020. SARS-CoV-2 outbreak investigation in a  
27 German meat processing plant. EMBO Mol Med 12:e13296. <https://doi.org/10.15252/emmm.2013296>

- 1 18. Settimo, G., Bertinato, L., Martuzzi, M., et al., 2022. CO<sub>2</sub> monitoring for prevention and management  
2 in indoor environments in relation to the transmission of SARS-CoV-2 virus infection. Interim technical note  
3 Istituto Superiore di Sanità ii, 24 p. Consulted at: [https://www.iss.it/en/-/interim-technical-note.-co2-](https://www.iss.it/en/-/interim-technical-note.-co2-monitoring-for-prevention-and-management-in-indoor-environments-in-relation-to-the-transmission-of-sars-cov-2-virus-infection)  
4 [monitoring-for-prevention-and-management-in-indoor-environments-in-relation-to-the-transmission-of-](https://www.iss.it/en/-/interim-technical-note.-co2-monitoring-for-prevention-and-management-in-indoor-environments-in-relation-to-the-transmission-of-sars-cov-2-virus-infection)  
5 [sars-cov-2-virus-infection](https://www.iss.it/en/-/interim-technical-note.-co2-monitoring-for-prevention-and-management-in-indoor-environments-in-relation-to-the-transmission-of-sars-cov-2-virus-infection)
- 6 19. Steinberg, J., Kennedy, E.D., Basler, C., et al., 2020. COVID-19 Outbreak Among Employees at a Meat  
7 Processing Facility — South Dakota, March–April 2020. MMWR Morb Mortal Wkly Rep 20:69:1015–1019.  
8 DOI: <http://dx.doi.org/10.15585/mmwr.mm6931a2external> icon.
- 9 20. VanderWaal, K., Black, L., Hodge, J., et al., 2021. Modeling transmission dynamics and effectiveness  
10 of worker screening programs for SARS-CoV-2 in pork processing plants. PLoS ONE 16: e0249143.  
11 <https://doi.org/10.1371/journal.pone.0249143> .



1 **Table 1:** Profile of the slaughterhouses and meat processing/cutting plants that participated to the  
2 questionnaire on voluntary basis. Due to the presence in the same plants of activities addressed to different  
3 animal species, the total number reported in Table 1 is greater than the number of the recorded  
4 questionnaires (N = 333).

| Species             | Activities |    |      | Total |
|---------------------|------------|----|------|-------|
|                     | S          | PC | S+PC |       |
| cattle              | 104        | 46 | 18   | 168   |
| horses              | 44         | 6  | 5    | 55    |
| cattle and horses   | 106        | 48 | 18   | 172   |
| pigs                | 131        | 85 | 18   | 234   |
| small ruminants     | 72         | 12 | 10   | 94    |
| poultry             | 27         | 18 | 4    | 49    |
| rabbits             | 9          | 9  | 1    | 19    |
| poultry and rabbits | 30         | 22 | 5    | 57    |

5 S = slaughterhouse, PC = processing/cutting plant; S+PC = slaughterhouse and processing/cutting plant.

6

7

1 **Table 2.** a) Working days per week (left) and b) Number of Workers  
 2 in those plants who participated to the survey (right).

| Working days | S   | CP  | S+CP | Total | Workers | Plants |
|--------------|-----|-----|------|-------|---------|--------|
| 1            | 54  | 8   | 4    | 66    | N       | N      |
| 2            | 61  | 7   | 4    | 72    | 1-5     | 105    |
| 3            | 15  | 8   | 2    | 25    | 6-10    | 52     |
| 4            | 14  | 7   | 3    | 24    | 11-25   | 55     |
| 5            | 45  | 60  | 7    | 112   | 26-50   | 31     |
| 6            | 13  | 13  | 7    | 33    | 51-100  | 15     |
| 7            | 1   | -   | -    | 1     | 100+    | 42     |
| <b>Total</b> | 203 | 103 | 27   | 333   | missed  | 33     |

3 S = slaughterhouse, PC = processing/cutting plant; S+PC =  
 4 slaughterhouse and processing/cutting plant

5  
 6

7 **Table 3.** Profile of PPE availability in each of the 293 responding plants, according to the number of workers

| Workers<br>(N) | Surgical<br>Masks | FFP1 | FFP2 | FFP3 | Gloves | Glass/<br>Face Shield | Overall |
|----------------|-------------------|------|------|------|--------|-----------------------|---------|
| 1-5            | 92                | 0    | 11   | 1    | 75     | 23                    | 16      |
| 6-10           | 44                | 1    | 9    | 0    | 38     | 10                    | 6       |
| 11-25          | 49                | 0    | 10   | 0    | 47     | 10                    | 12      |
| 26-50          | 29                | 0    | 4    | 0    | 24     | 5                     | 11      |
| 51-100         | 15                | 0    | 1    | 0    | 13     | 4                     | 3       |
| 100+           | 38                | 1    | 8    | 0    | 29     | 15                    | 6       |
| MISSED         | 26                | 2    | 2    | 1    | 25     | 8                     | 9       |
| <b>Total</b>   | 293               | 4    | 45   | 2    | 251    | 75                    | 63      |

8  
 9

1 **Table 4.** Number of natural ventilation vs mechanical Heating, Ventilation, Air  
2 Conditioning (HVAC) in the premises of 333 meat plants: between (brackets),  
3 the number of premises with HVAC air recycling > 30% .

| Premise       | Ventilation |         |                      | Total |
|---------------|-------------|---------|----------------------|-------|
|               | Natural     | HVAC    | HVAC<br>Not Reported |       |
| Working area  | 234         | 91 (26) | 8                    | 333   |
| Offices       | 306         | 8 (2)   | 19                   | 333   |
| Changing Room | 288         | 25 (7)  | 20                   | 333   |
| Canteen       | 156         | 17 (6)  | 160                  | 333   |
| Shared Places | 245         | 24 (7)  | 64                   | 333   |

4

5

1 **Table 5.** Descriptors of the COVID-19 Outbreaks recorded in Italian meat plants, on voluntary basis.

| Province  | Species         | Workers<br>(N) | S_C<br>(N) | T_W<br>(N) | Outbreak |          |      | Workers       |                  |     | Companies<br>(N) | Report<br>dd/mm/yy |
|-----------|-----------------|----------------|------------|------------|----------|----------|------|---------------|------------------|-----|------------------|--------------------|
|           |                 |                |            |            | Start    | End      | Days | tested<br>(N) | Positives<br>(N) | %   |                  |                    |
| TRENTO    | S (S)           | 210            | 2          | 40         | 09/09/20 | 02/10/20 | 22   | 169           | 33               | 20  | 3                | 04/12/20           |
| NAPOLI    | S (P)           | 195            | 2          | 0          | 28/08/20 | 10/10/20 | 41   | 195           | 87               | 45  | 2                | 15/12/20           |
| TRENTO    | S (S)           | 206            | 3          | 71         | 08/09/20 | 23/09/20 | 15   | 140           | 33               | 24  | 4                | 05/01/21           |
| TRENTO    | CP (S)          | 119            | 4          | 71         | 01/09/20 | 23/09/20 | 22   | 122           | 81               | 66  | 5                | 05/01/21           |
| TRENTO    | S (S)           | 36             | 2          | 42         | 16/09/20 | 05/10/20 | 19   | 36            | 25               | 69  | 3                | 05/01/21           |
| TRENTO    | CP (na)         | 35             | 5          | 71         | 04/09/20 | 23/09/20 | 19   | 35            | 13               | 37  | 3                | 05/01/21           |
| BARI      | S (C,S,SR,H)    | 13             | 0          | 0          | 03/11/20 | 30/11/20 | 27   | 15            | 4                | 27  | 1                | 14/01/21           |
| BARI      | S (C,S,SR,H)    | 50             | 0          | 0          | 13/11/20 | 20/12/20 | 37   | 50            | 6                | 12  | 1                | 03/02/21           |
| TREVISO   | S (C,H)         | 19             | 5          | 26         | 20/11/20 | 27/11/20 | 17   | 18            | 0                | 0   | 1                | 12/02/21           |
| BARI      | S (C,S,SR)      | 438            | 7          | 71         | 23/04/20 | 19/05/20 | 26   | 487           | 112              | 23  | 7                | 26/03/21           |
| TREVISO   | S (C)           | 180            | 5          | 50         | 17/11/20 | 10/12/20 | 23   | 43            | 20               | 47  | 1                | 27/04/21           |
| VENEZIA   | S (P)           | 122            | 2          | 6          | 28/10/20 | 10/01/21 | 12   | 180           | 49               | 27  | 2                | 19/07/21           |
| RAGUSA    | S (P)           | 205            | 2          | na         | 05/11/20 | 02/12/20 | 27   | 205           | 12               | 6   | 1                | 15/09/21           |
| RAGUSA    | S (P)           | 250            | 2          | na         | 30/03/21 | 30/06/21 | 90   | 57            | 8                | 14  | 1                | 16/09/21           |
| MANTOVA   | S (S)           | 350            | 4          | 65         | 29/06/20 | 15/07/20 | 16   | 350           | 50               | 14  | 5                | 04/10/20           |
| MANTOVA   | S (S)           | 184            | 5          | 56         | 10/07/21 | 30/07/21 | 20   | 184           | 10               | 5   | 3                | 19/01/21           |
| MANTOVA   | S, CP (S)       | 350            | 2          | 60         | 10/06/21 | 25/06/21 | 15   | 123           | 38               | 31  | 2                | 30/09/21           |
| MANTOVA   | CP (na)         | 15             | 1          | 17         | 30/06/20 | 13/08/20 | 44   | 15            | 7                | 47  | 2                | 04/11/21           |
| MANTOVA   | S, CP (C,S)     | 150            | 1          | 6          | 22/02/21 | 05/04/21 | 44   | 152           | 5                | 3   | 1                | 29/09/21           |
| MANTOVA   | S (S)           | 270            | 3          | 40         | 16/08/21 | 24/08/21 | 8    | 8             | 1                | 13  | 3                | 20/10/21           |
| MANTOVA   | CP (na)         | 400            | 2          | 5          | 26/07/21 | 16/08/21 | 20   | 30            | 6                | 20  | 1                | 27/09/21           |
| MANTOVA   | S (C)           | 270            | 6          | 70         | 04/04/20 | 29/10/21 | 25   | 267           | 47               | 18  | 4                | 05/11/21           |
| PADOVA    | S (P)           | 45             | 2          | 20         | 22/10/20 | 09/11/20 | 18   | 27            | 9                | 33  | 1                | 10/08/21           |
| REGGIO C. | S (C, S, SR, H) | 7              | 0          | 0          | 01/01/21 | 30/06/21 | 180  | 7             | 7                | 100 | 1                | 26/09/22           |

2 S\_C = Subcontractors; T\_W = temporary workers; na = not available. S = Slaughterhouse; CP = processing and cutting plant; C= cattle;  
3 S= Swine; P = Poultry; SR = Small Ruminants, H = horses

4

1 **Table 6.** Descriptors of the corrective measures taken in the recorded 24 outbreak management

| Measure                                                                  | Plants (N) | %  |
|--------------------------------------------------------------------------|------------|----|
| Personal Protective Equipments                                           | 8          | 33 |
| Intensified checks about application of preventive measures              | 10         | 42 |
| Cleaning and disinfection (sanitization)                                 | 16         | 67 |
| Ventilation                                                              | 6          | 25 |
| Change in the plant structure and layout revision                        | 1          | 4  |
| Change in the entrance/exit procedures for external personnel            | 10         | 42 |
| Change of the entrance                                                   | 10         | 42 |
| Personal Hygiene                                                         | 9          | 38 |
| Workers information                                                      | 10         | 42 |
| Increase of the working place distances                                  | 4          | 17 |
| Physical barriers among workers and among internal vs external personnel | 4          | 17 |
| Homogeneous composition of workshift force                               | 1          | 4  |

2

3

4

5

Compromised **Animal Health/Welfare**  
at farm due to delayed or missed consignment = Food waste

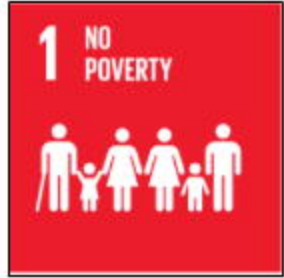

Ethics in workforce recruitment  
Social security

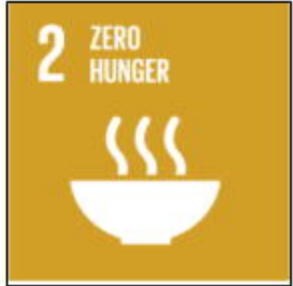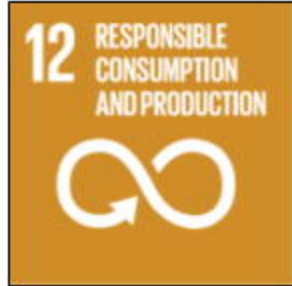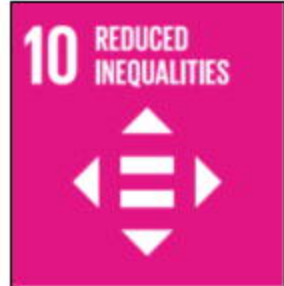

**Public Health**  
Clusters in plant meat workers' residential settings

Scarcity of meat products at retailer levels = Food insecurity

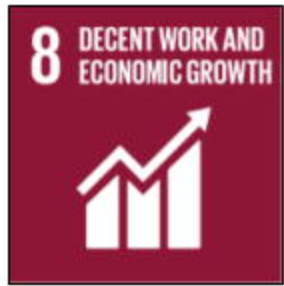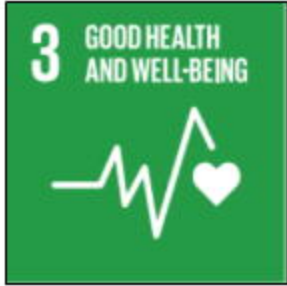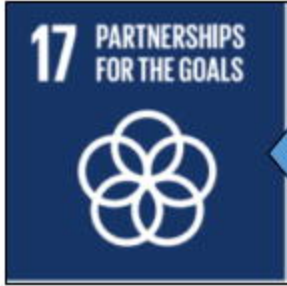

Barriers to the meat export, due to surface/packaging Sars-CoV-2 contamination = Food chain disruption

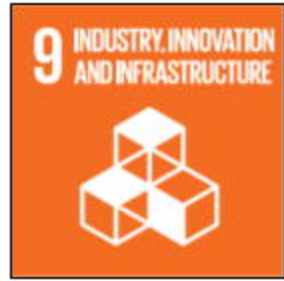

**Environmental & Occupational Health**

Innovation and structural changes

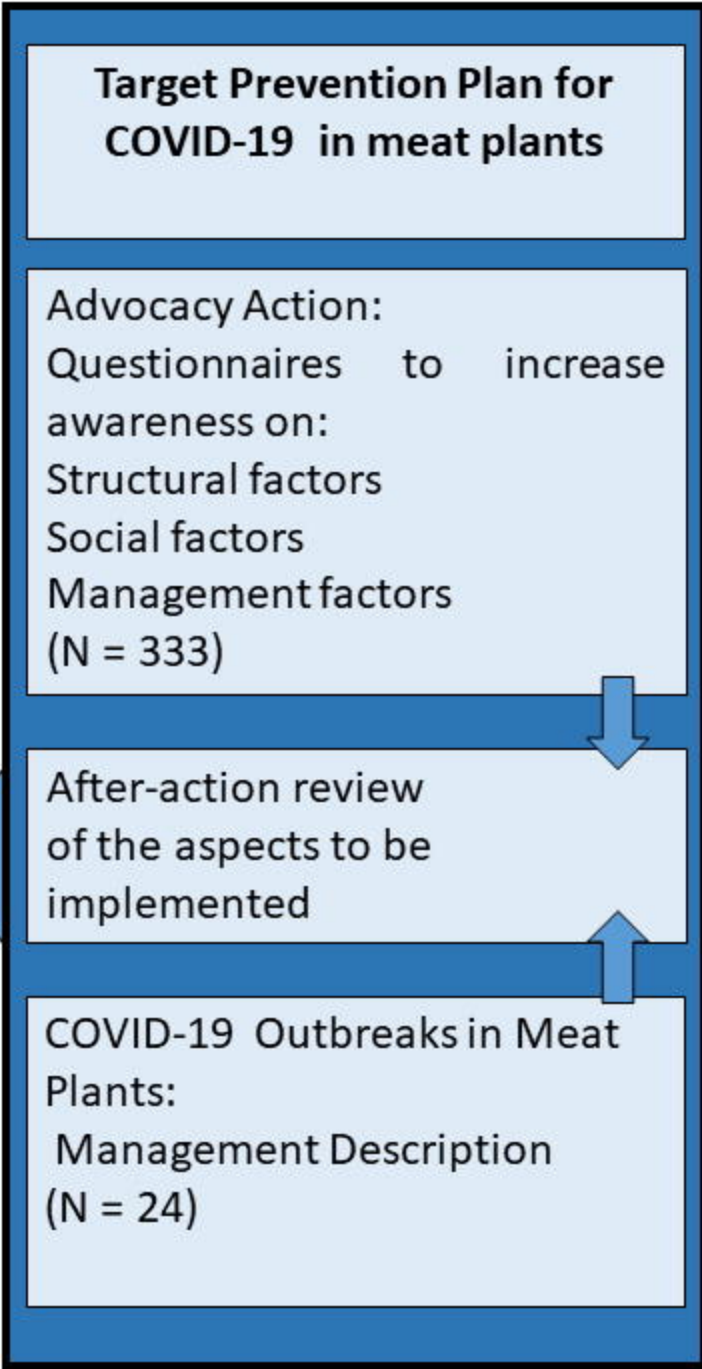

# new daily Covid-19 symptomatic cases

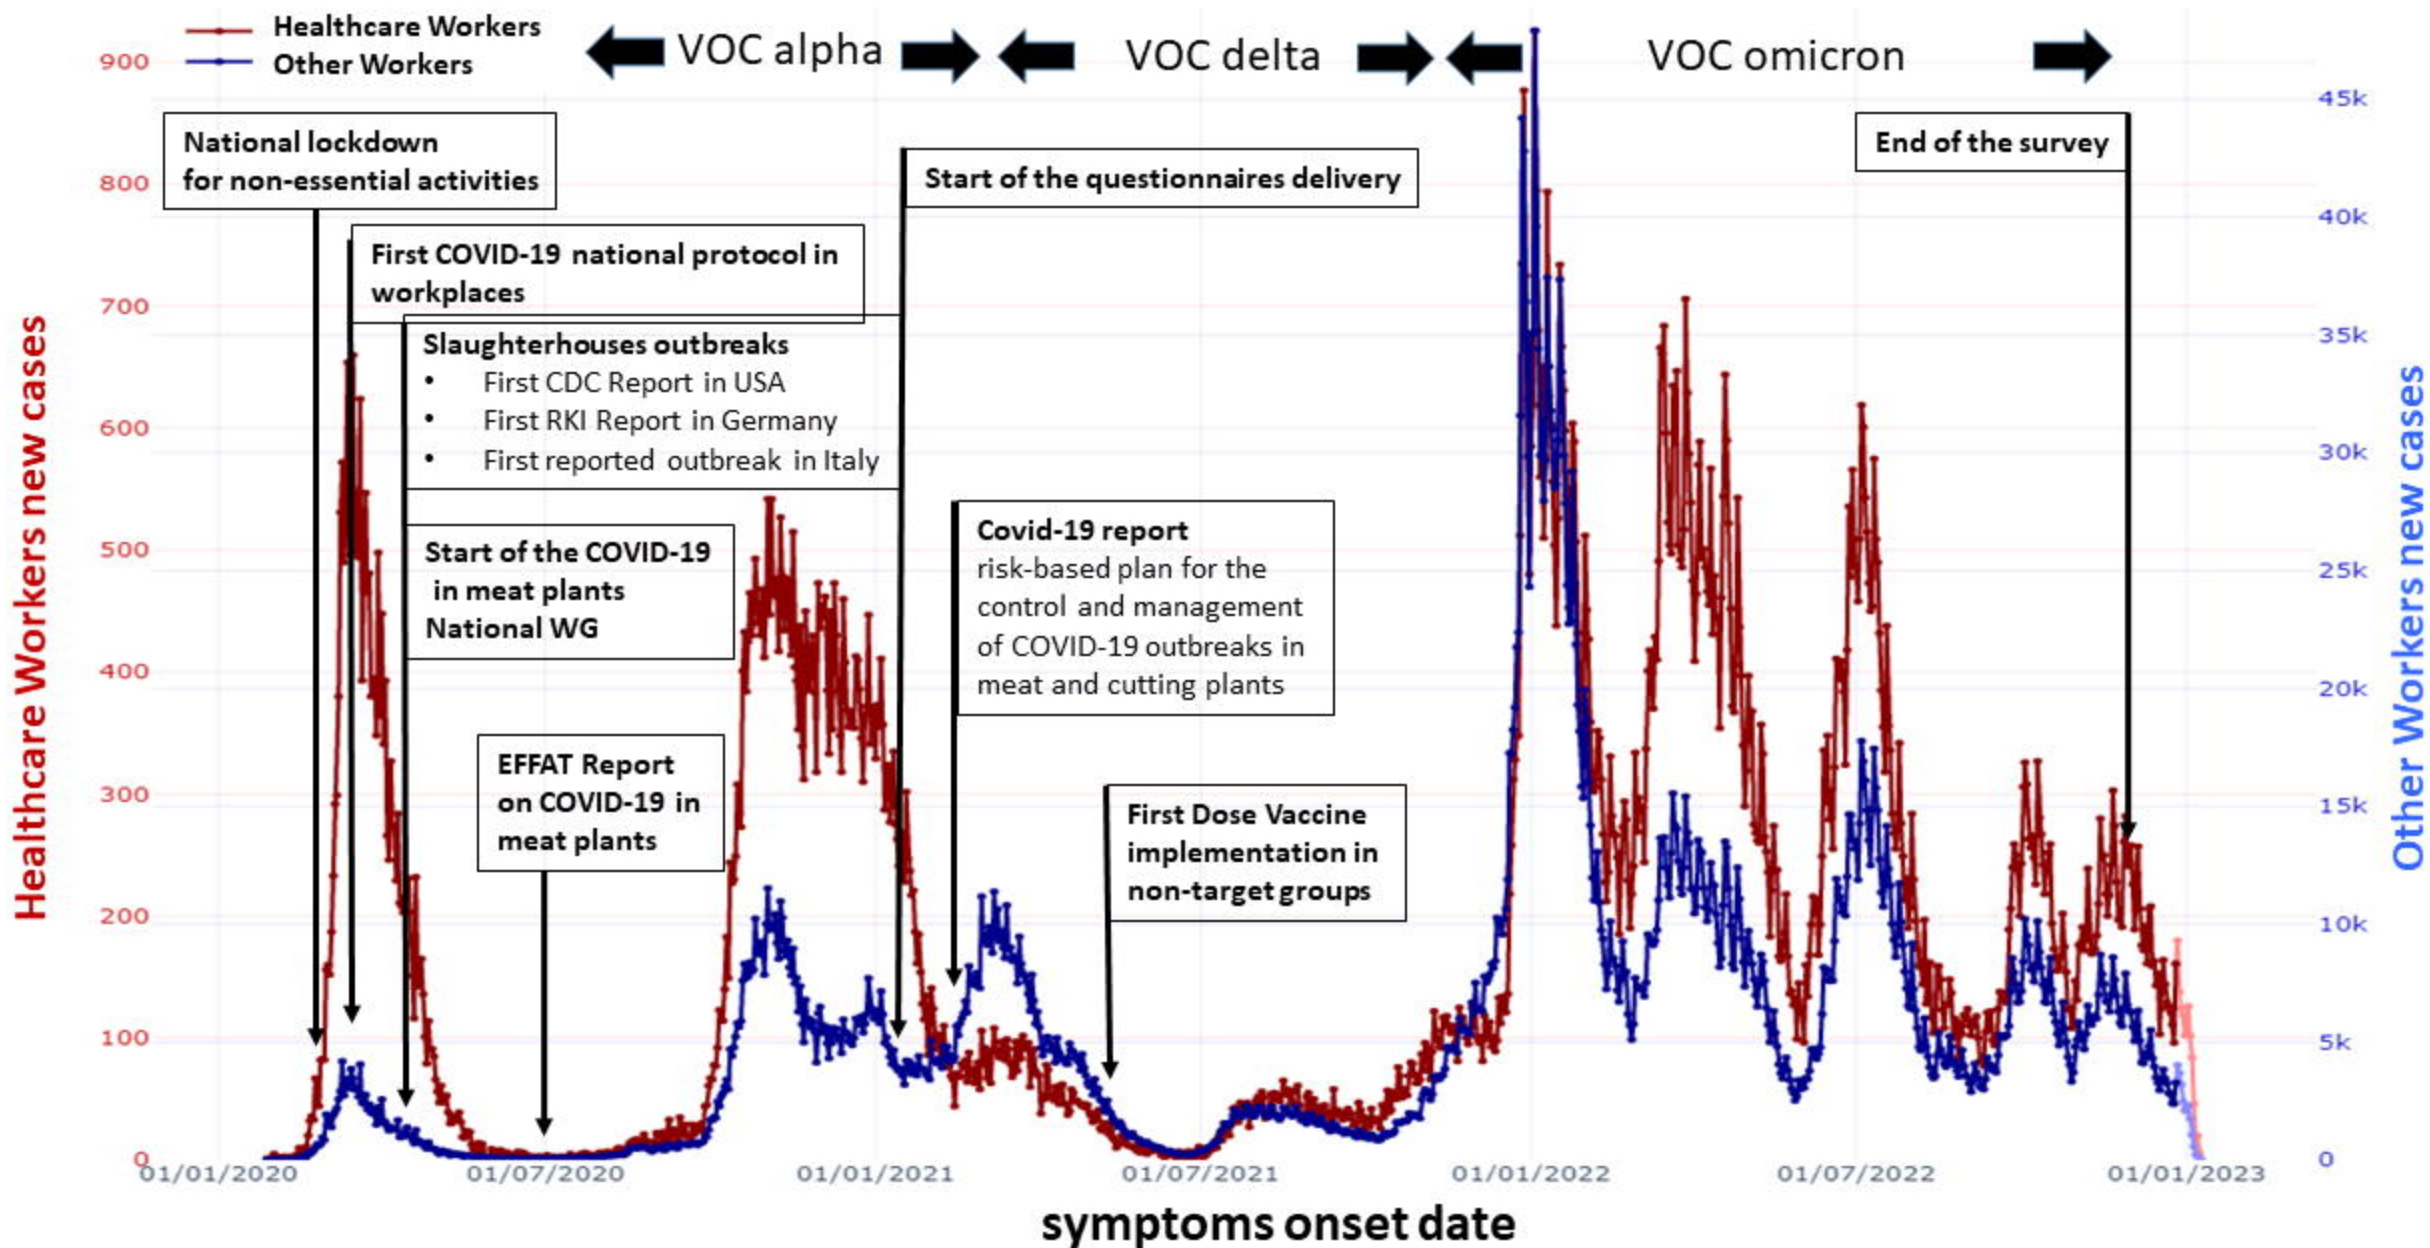

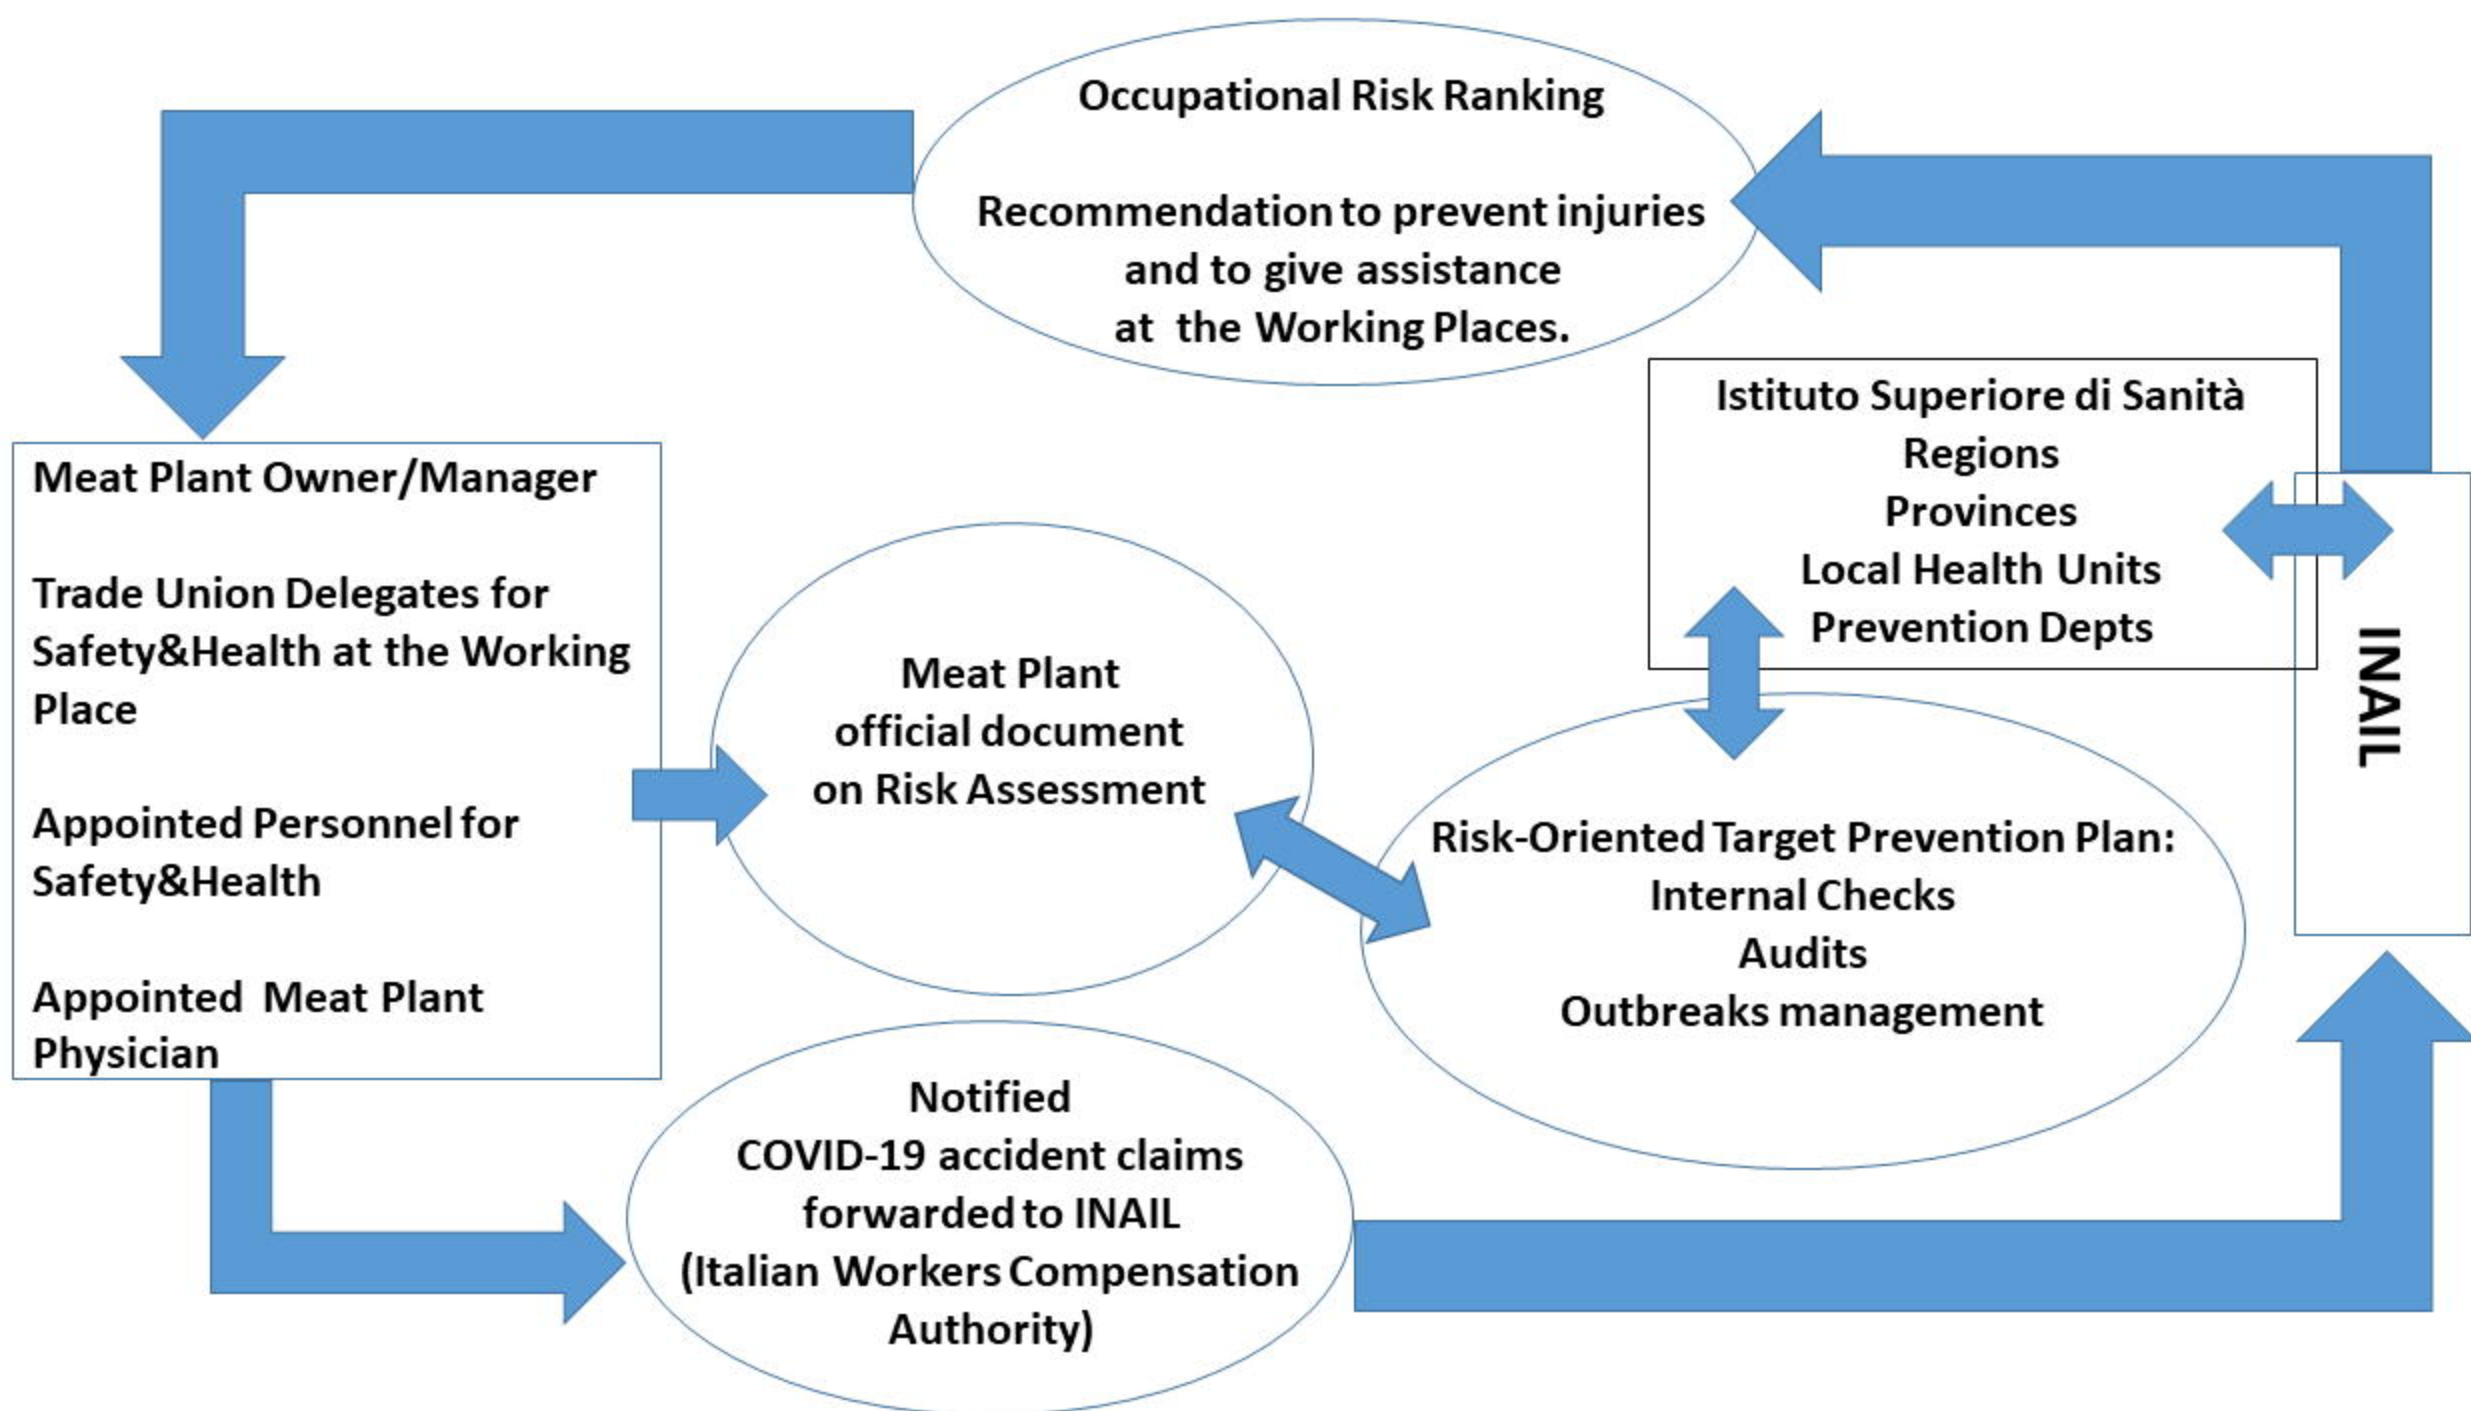

Source: https://medrxiv.org/content/10.1101/2023.05.08.23289661v1.full.pdf
